# Supplementary material for: Sociocultural Influences on the Feeling of Loneliness of Family Caregivers of People with Dementia: The Role of Kinship
Source: MDPI journal article supplement (doi:10.3390/ijerph18094700), 2021-04-28
Supplement: s1 [file s1]

**Correlation matrix for husbands**

| VARIABLES                         | 1       | 2       | 3     | 4     | 5     | 6     | 7     | 8     | 9      | 10    | 11     | 12    | 13    |
|-----------------------------------|---------|---------|-------|-------|-------|-------|-------|-------|--------|-------|--------|-------|-------|
| 1 .Age                            |         |         |       |       |       |       |       |       |        |       |        |       |       |
| 2. Feeling of loneliness          | −0.03   |         |       |       |       |       |       |       |        |       |        |       |       |
| 3. Work outside home              | 0.26*   | −0.10   |       |       |       |       |       |       |        |       |        |       |       |
| 4. Live with children             | −0.18   | −0.01   | −0.04 |       |       |       |       |       |        |       |        |       |       |
| 5. Care for others                | −0.27*  | 0.13    | −0.03 | −0.05 |       |       |       |       |        |       |        |       |       |
| 6. Frequency disruptive behaviors | −0.14   | 0.35**  | −0.11 | 0.04  | −0.07 |       |       |       |        |       |        |       |       |
| 7. Functional capacity            | −0.23   | −0.09   | −0.15 | 0.06  | 0.01  | −0.08 |       |       |        |       |        |       |       |
| 8. Hours of care                  | −0.01   | −0.09   | −0.13 | 0.15  | −0.12 | 0.15  | 0.20  |       |        |       |        |       |       |
| 9.Family obligations              | 0.23    | 0.02    | −0.20 | 0.04  | −0.18 | 0.13  | 0.10  | 0.09  |        |       |        |       |       |
| 10.Dysfunctional Thoughts         | 0.37**  | −0.11   | 0.16  | 0.12  | −0.03 | −0.10 | −0.07 | 0.31* | 0.42** |       |        |       |       |
| 11. Requesting help               | 0.01    | −0.07   | 0.13  | 0.19  | −0.01 | −0.11 | −0.12 | 0.06  | −0.34* | −0.23 |        |       |       |
| 12. Receiving help                | −0.10   | −0.17   | 0.00  | 0.23  | 0.00  | −0.26 | −0.05 | −0.02 | −0.21  | −0.18 | 0.67** |       |       |
| 13. Social Support                | 0.01    | −0.27*  | −0.02 | 0.20  | −0.27 | −0.16 | −0.08 | 0.07  | −0.23  | −0.14 | 0.36** | 0.35* |       |
| 14. Leisure                       | −0.37** | −0.36** | −0.17 | −0.02 | 0.07  | −0.21 | 0.21  | −0.17 | −0.04  | −0.26 | 0.07   | 0.11  | 0.30* |

\* =  $p < .05$ ; \*\* =  $p < .01$

**Correlation matrix for wives**

| VARIABLES                         | 1       | 2      | 3     | 4     | 5     | 6     | 7     | 8     | 9      | 10      | 11     | 12   | 13   |
|-----------------------------------|---------|--------|-------|-------|-------|-------|-------|-------|--------|---------|--------|------|------|
| 1. Age                            |         |        |       |       |       |       |       |       |        |         |        |      |      |
| 2. Feeling of loneliness          | 0.06    |        |       |       |       |       |       |       |        |         |        |      |      |
| 3. Work outside home              | −0.24*  | −0.06  |       |       |       |       |       |       |        |         |        |      |      |
| 4. Live with children             | −0.25*  | −0.06  | −0.03 |       |       |       |       |       |        |         |        |      |      |
| 5. Care for others                | −0.15   | −0.16  | 0.03  | 0.07  |       |       |       |       |        |         |        |      |      |
| 6. Frequency disruptive behaviors | −0.01   | −0.08  | −0.19 | −0.17 | −0.11 |       |       |       |        |         |        |      |      |
| 7. Functional capacity            | −0.16   | −0.13  | −0.10 | −0.12 | 0.19  | 0.14  |       |       |        |         |        |      |      |
| 8. Hours of care                  | 0.08    | −0.05  | −0.04 | −0.08 | −0.19 | 0.14  | −0.03 |       |        |         |        |      |      |
| 9. Family obligations             | 0.48**  | −0.01  | −0.16 | −0.12 | −0.09 | −0.06 | −0.04 | 0.10  |        |         |        |      |      |
| 10. Dysfunctional Thoughts        | 0.47**  | 0.13   | −0.19 | −0.07 | −0.04 | −0.01 | −0.23 | 0.02  | 0.53** |         |        |      |      |
| 11. Requesting help               | 0.01    | −0.15  | 0.01  | 0.12  | 0.16  | −0.14 | 0.02  | −0.01 | −0.23  | −0.32** |        |      |      |
| 12. Receiving help                | 0.15    | −0.26* | −0.04 | 0.02  | −0.07 | −0.02 | −0.17 | 0.05  | −0.01  | −0.15   | 0.59** |      |      |
| 13. Social Support                | −0.07   | −0.07  | 0.05  | −0.15 | −0.07 | −0.05 | 0.15  | −0.20 | −0.07  | −0.09   | 0.15   | 0.22 |      |
| 14. Leisure                       | −0.33** | −0.16  | 0.13  | −0.02 | −0.01 | 0.09  | 0.44* | 0.22  | −0.25* | −0.38** | 0.25*  | 0.03 | 0.16 |

\* =  $p < .05$ ; \*\* =  $p < .01$

**Correlation matrix for daughters**

| VARIABLES                         | 1       | 2       | 3       | 4     | 5     | 6       | 7     | 8     | 9      | 10      | 11    | 12     | 13     |
|-----------------------------------|---------|---------|---------|-------|-------|---------|-------|-------|--------|---------|-------|--------|--------|
| 1 .Age                            |         |         |         |       |       |         |       |       |        |         |       |        |        |
| 2. Feeling of loneliness          | −0.04   |         |         |       |       |         |       |       |        |         |       |        |        |
| 3. Work outside home              | −0.30** | −0.13   |         |       |       |         |       |       |        |         |       |        |        |
| 4. Live with children             | −0.23*  | 0.07    | 0.00    |       |       |         |       |       |        |         |       |        |        |
| 5. Care for others                | 0.00    | −0.21*  | −0.14   | 0.01  |       |         |       |       |        |         |       |        |        |
| 6. Frequency disruptive behaviors | −0.23*  | 0.16    | 0.19*   | 0.01  | 0.15  |         |       |       |        |         |       |        |        |
| 7. Functional capacity            | −0.24** | −0.02   | −0.04   | 0.127 | −0.09 | 0.16    |       |       |        |         |       |        |        |
| 8. Hours of care                  | 0.11    | 0.11    | −0.25** | −0.08 | −0.10 | −0.07   | −0.08 |       |        |         |       |        |        |
| 9.Family obligations              | 0.08    | 0.02    | −0.07   | 0.00  | 0.01  | 0.01    | 0.01  | −0.01 |        |         |       |        |        |
| 10.Dysfunctional Thoughts         | 0.27**  | 0.25**  | −0.13   | −0.02 | −0.14 | −0.13   | −0.05 | 0.07  | 0.61** |         |       |        |        |
| 11. Requesting help               | −0.19*  | −0.11   | 0.02    | 0.09  | 0.07  | −0.02   | −0.00 | −0.05 | −0.14  | −0.21*  |       |        |        |
| 12. Receiving help                | 0.07    | −0.31*  | 0.22*   | −0.01 | −0.02 | −0.13   | −0.09 | −0.07 | −0.04  | −0.05   | 0.36* |        |        |
| 13. Social Support                | −0.04   | −0.45** | 0.10    | −0.03 | −0.14 | −0.28** | 0.12  | −0.03 | 0.12   | −0.06   | 0.14  | 0.27** |        |
| 14. Leisure                       | −0.04   | −0.42** | 0.05    | 0.02  | −0.05 | −0.14   | 0.09  | −0.05 | −0.17  | −0.26** | 0.10  | 0.23*  | 0.39** |

\* =  $p < .05$ ; \*\* =  $p < .01$

### Correlation matrix for sons

| VARIABLES                                | 1      | 2       | 3      | 4       | 5     | 6      | 7     | 8      | 9      | 10    | 11     | 12    | 13     |
|------------------------------------------|--------|---------|--------|---------|-------|--------|-------|--------|--------|-------|--------|-------|--------|
| <b>1 .Age</b>                            |        |         |        |         |       |        |       |        |        |       |        |       |        |
| <b>2. Feeling of loneliness</b>          | −0.10  |         |        |         |       |        |       |        |        |       |        |       |        |
| <b>3. Work outside home</b>              | −0.50* | 0.17    |        |         |       |        |       |        |        |       |        |       |        |
| <b>4. Live with children</b>             | −0.06  | −0.09   | 0.02   |         |       |        |       |        |        |       |        |       |        |
| <b>5. Care for others</b>                | 0.17   | 0.03    | 0.26   | 0.31+   |       |        |       |        |        |       |        |       |        |
| <b>6. Frequency disruptive behaviors</b> | −0.15  | 0.48    | 0.07   | 0.06    | 0.03  |        |       |        |        |       |        |       |        |
| <b>7. Functional capacity</b>            | −0.17  | −0.22   | 0.18   | 0.08    | −0.02 | 0.00   |       |        |        |       |        |       |        |
| <b>8. Hours of care</b>                  | 0.22   | −0.14   | −0.25  | −0.14   | 0.09  | 0.02   | 0.08  |        |        |       |        |       |        |
| <b>9. Family obligations</b>             | 0.17   | 0.14    | −0.13  | −0.49** | −0.20 | −0.04  | 0.08  | 0.12   |        |       |        |       |        |
| <b>10. Dysfunctional Thoughts</b>        | 0.29   | −0.29   | −0.37* | −0.27   | 0.04  | −0.22  | 0.11  | 0.44** | 0.51** |       |        |       |        |
| <b>11. Requesting help</b>               | −0.22  | −0.21   | −0.04  | −0.04   | −0.18 | −0.17  | 0.42* | 0.17   | 0.14   | 0.24  |        |       |        |
| <b>12. Receiving help</b>                | −0.19  | −0.30*  | 0.213  | −0.11   | −0.10 | −0.32+ | 0.36* | 0.04   | 0.08   | 0.19  | 0.58** |       |        |
| <b>13. Social Support</b>                | −0.20  | −0.11   | 0.04   | 0.02    | −0.19 | −0.13  | 0.12  | −0.20  | 0.15   | −0.12 | 0.49** | 0.30+ |        |
| <b>14. Leisure</b>                       | 0.08   | −0.50** | 0.01   | 0.24    | −0.13 | −0.06  | 0.28  | −0.18  | −0.09  | −0.15 | 0.19   | 0.23  | 0.38** |

+ = p. < .10; \* = p < .05; \*\* = p < .01
